# Supplementary material
Source: Springer Nature journal article supplement (https://www.springermedizin.de/resource/supplementary/12913_2009_1233_MOESM11_ESM.pdf/9528454)

**Figure 3. Distribution of Third Generation QIs in a Cross National Sample.**

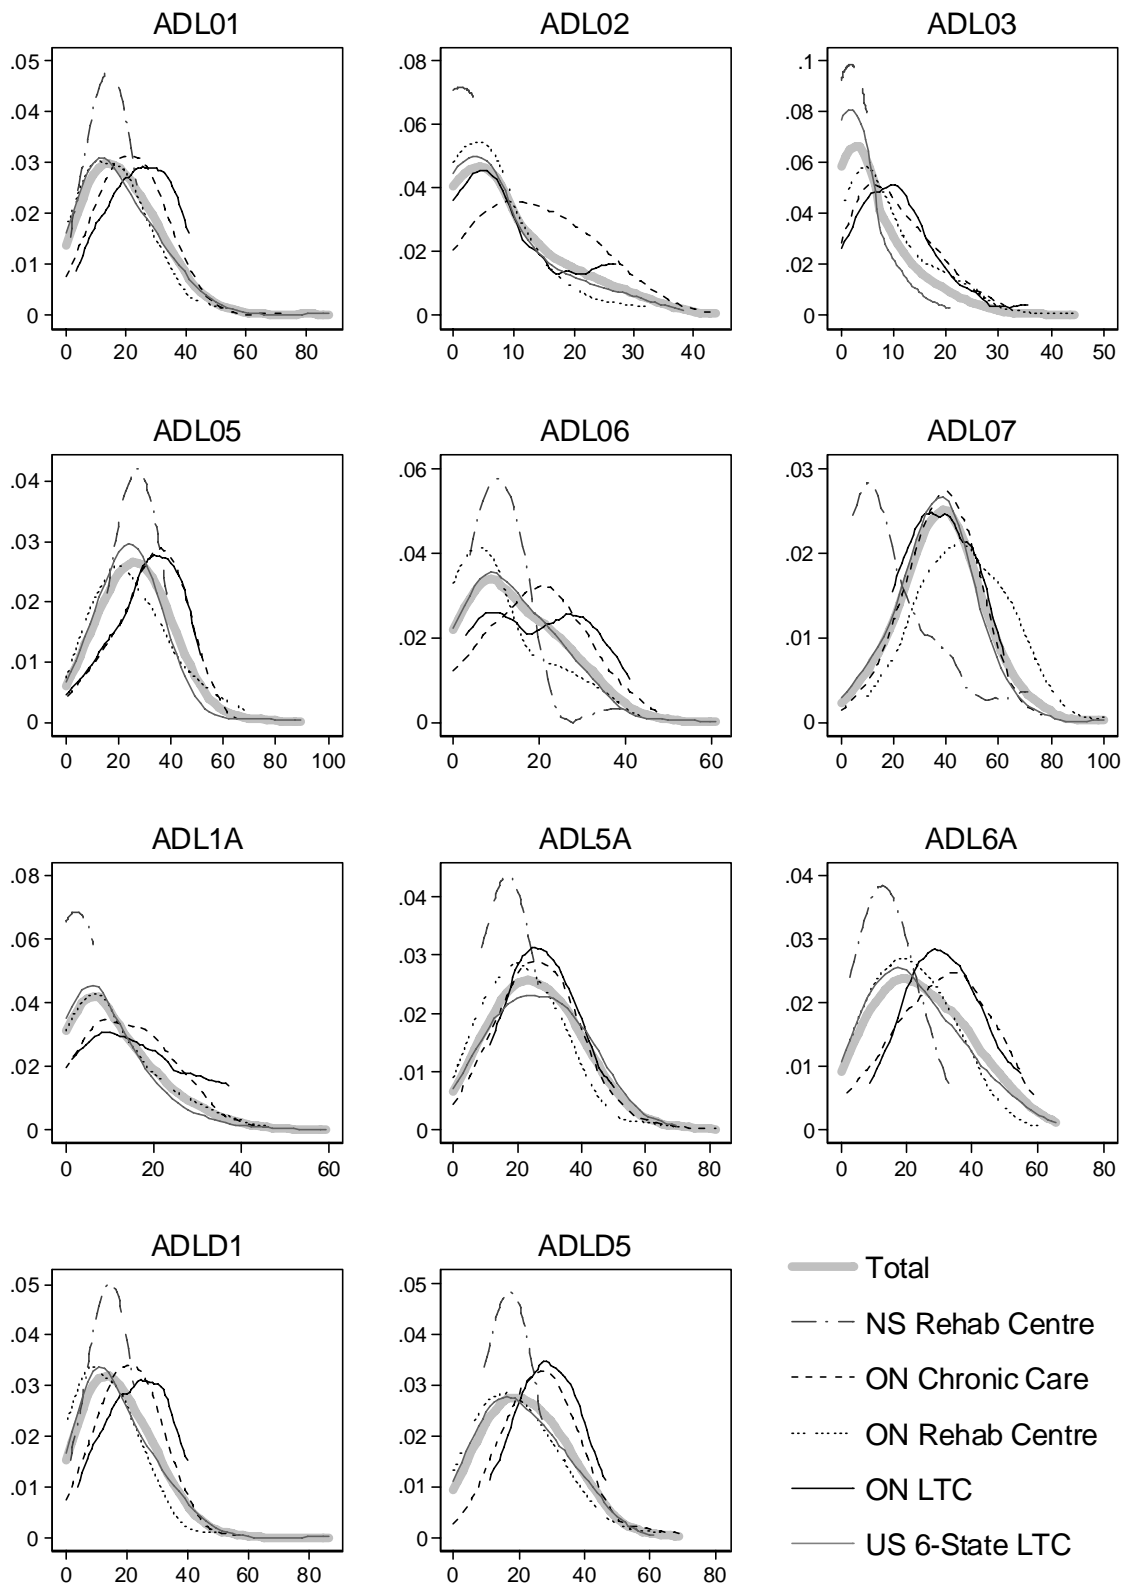

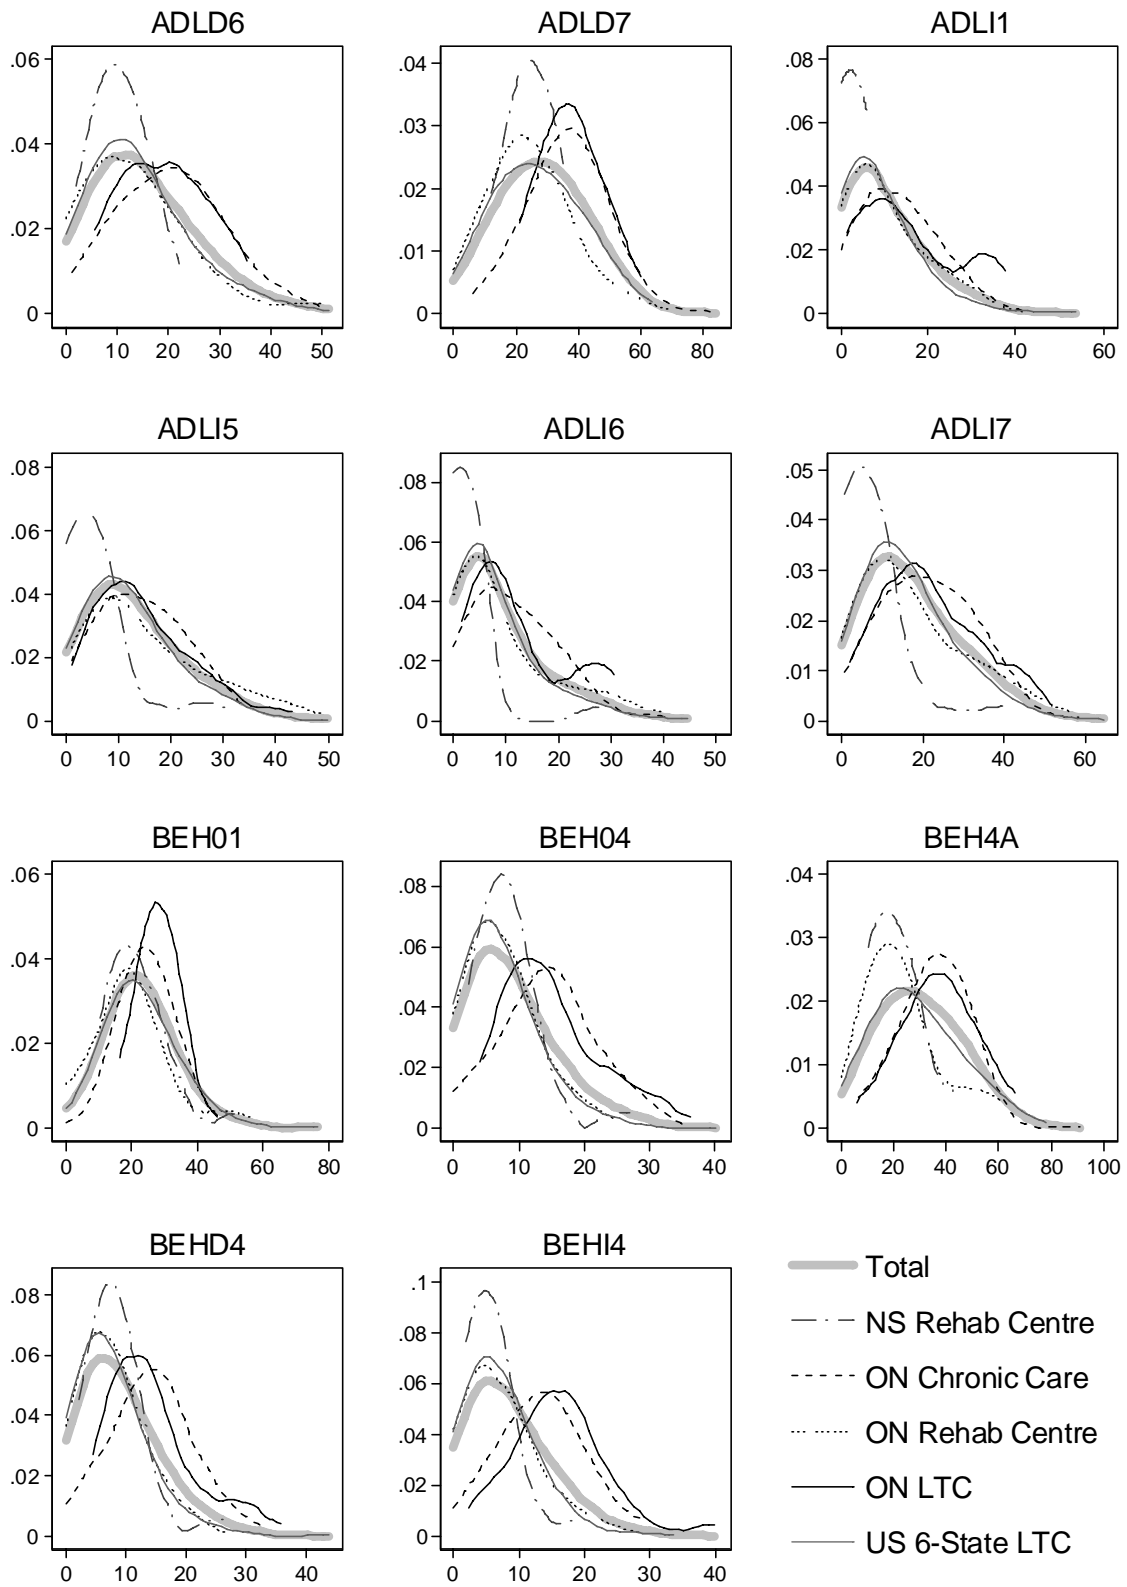

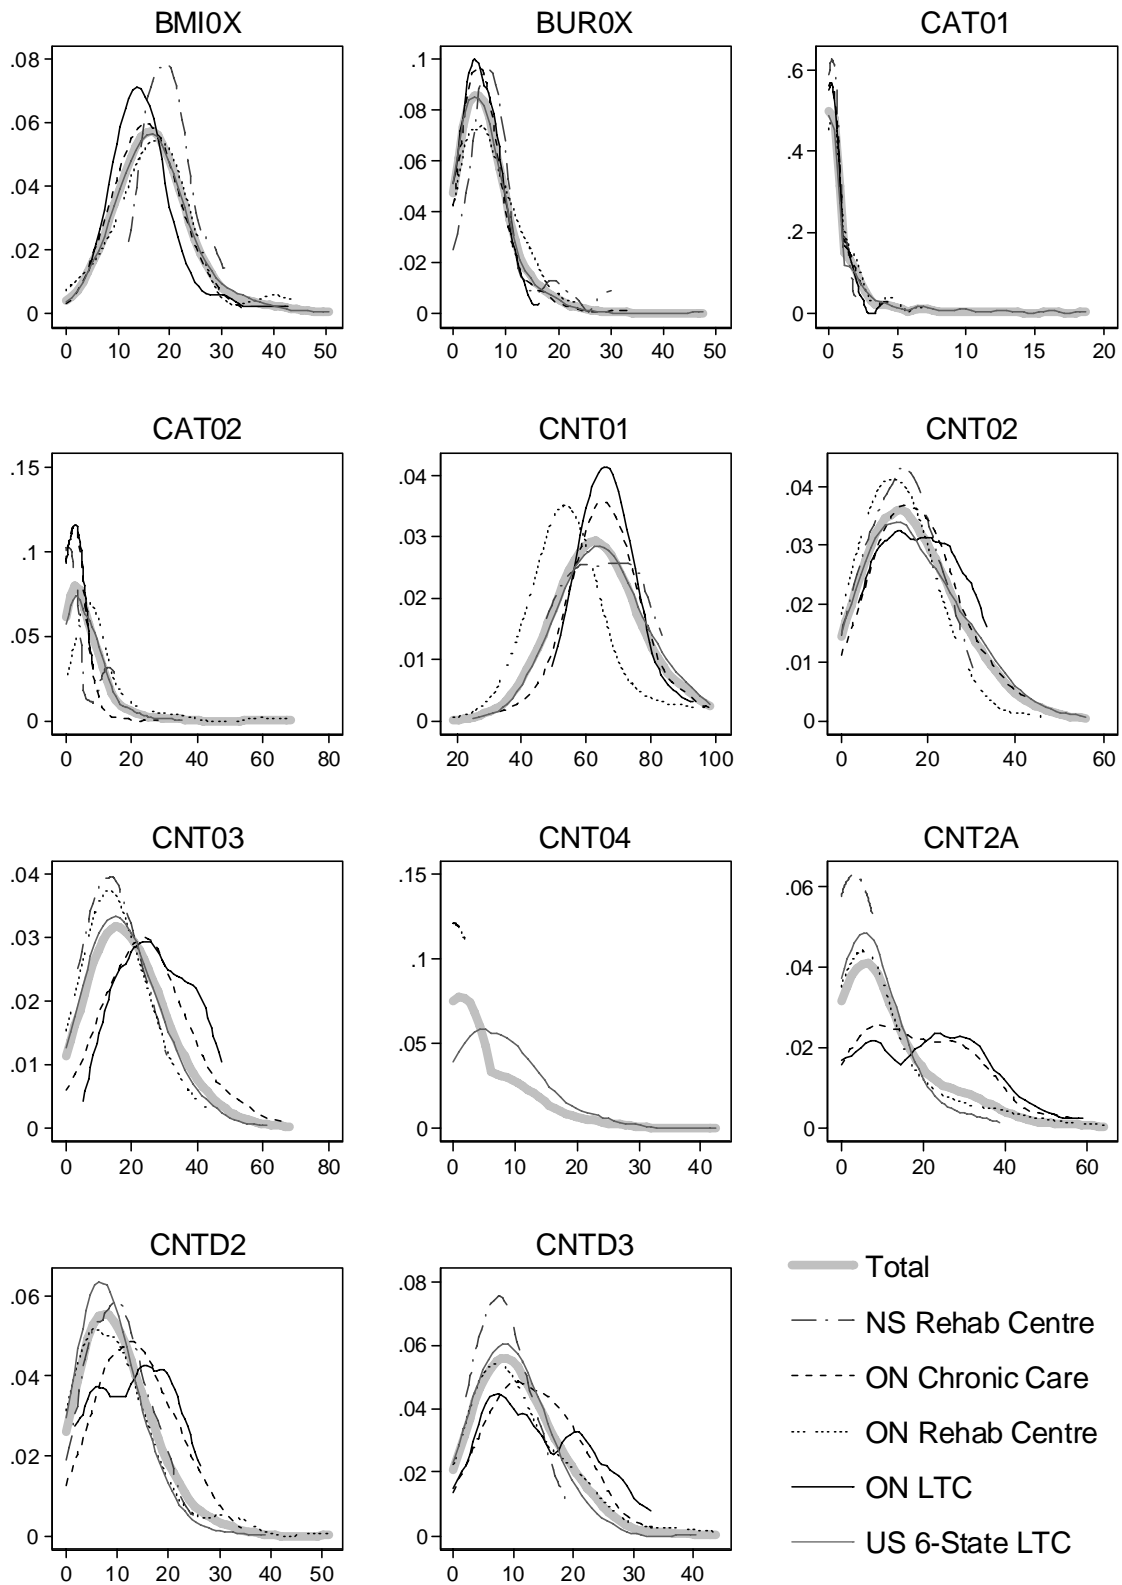

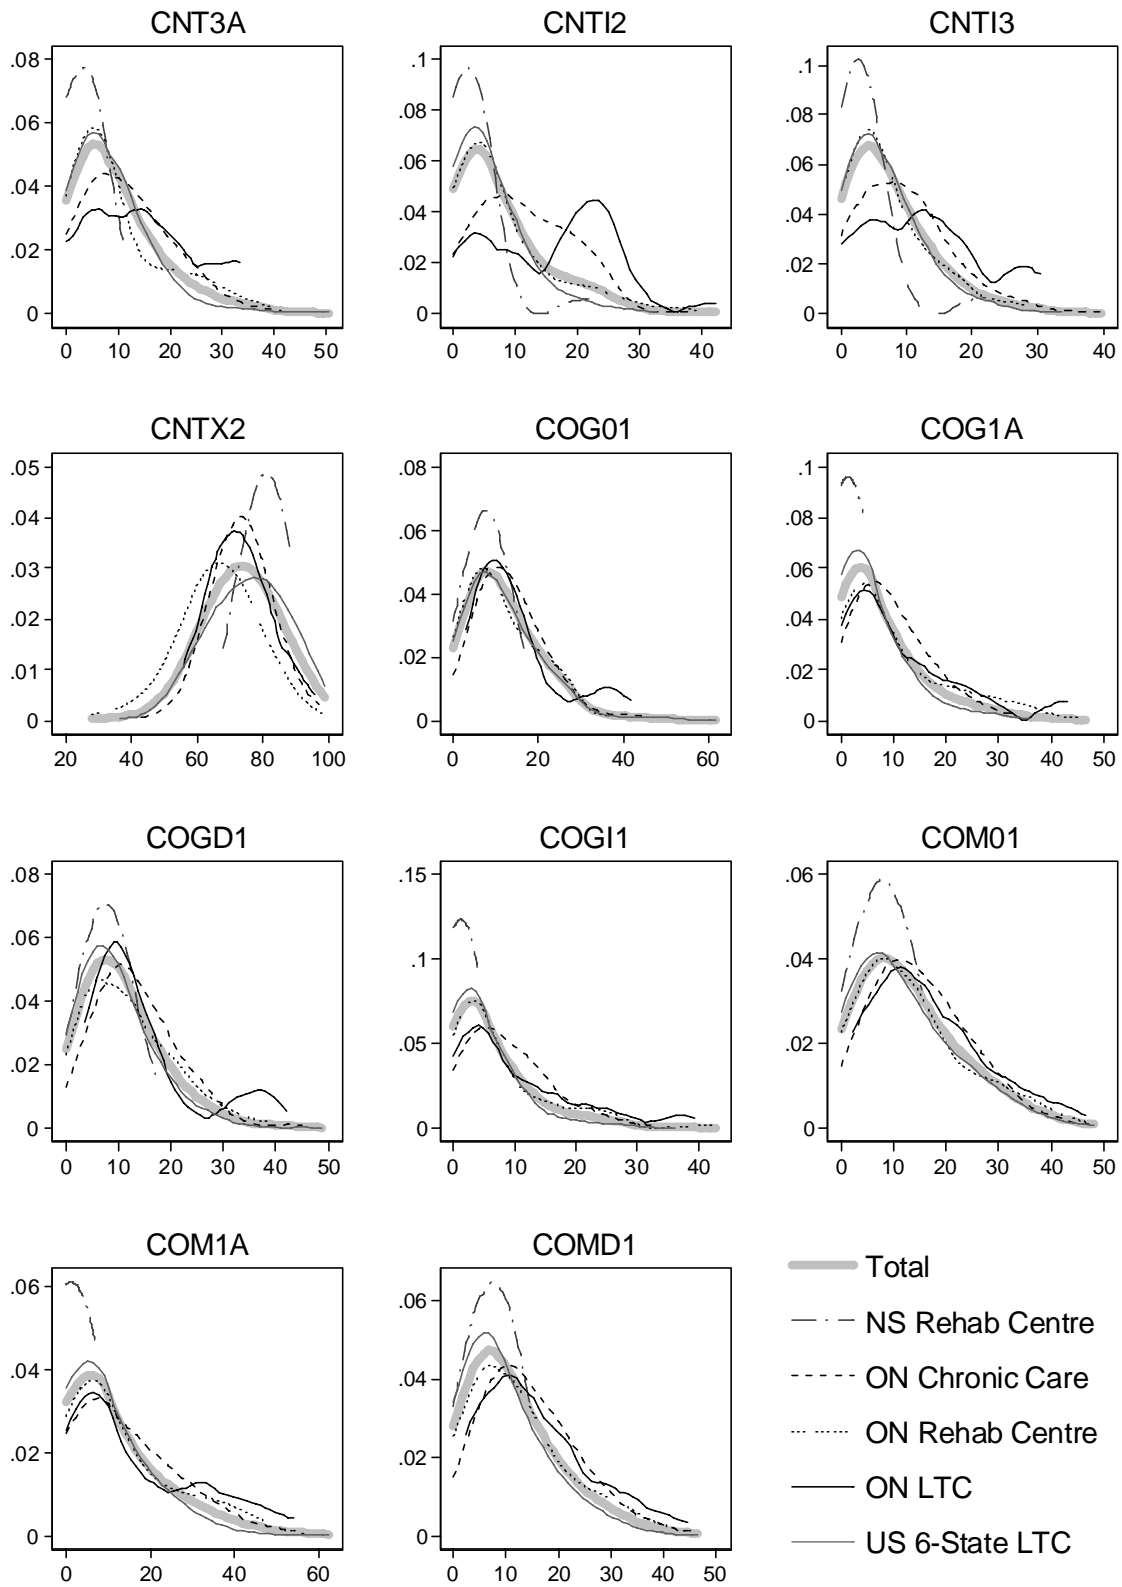

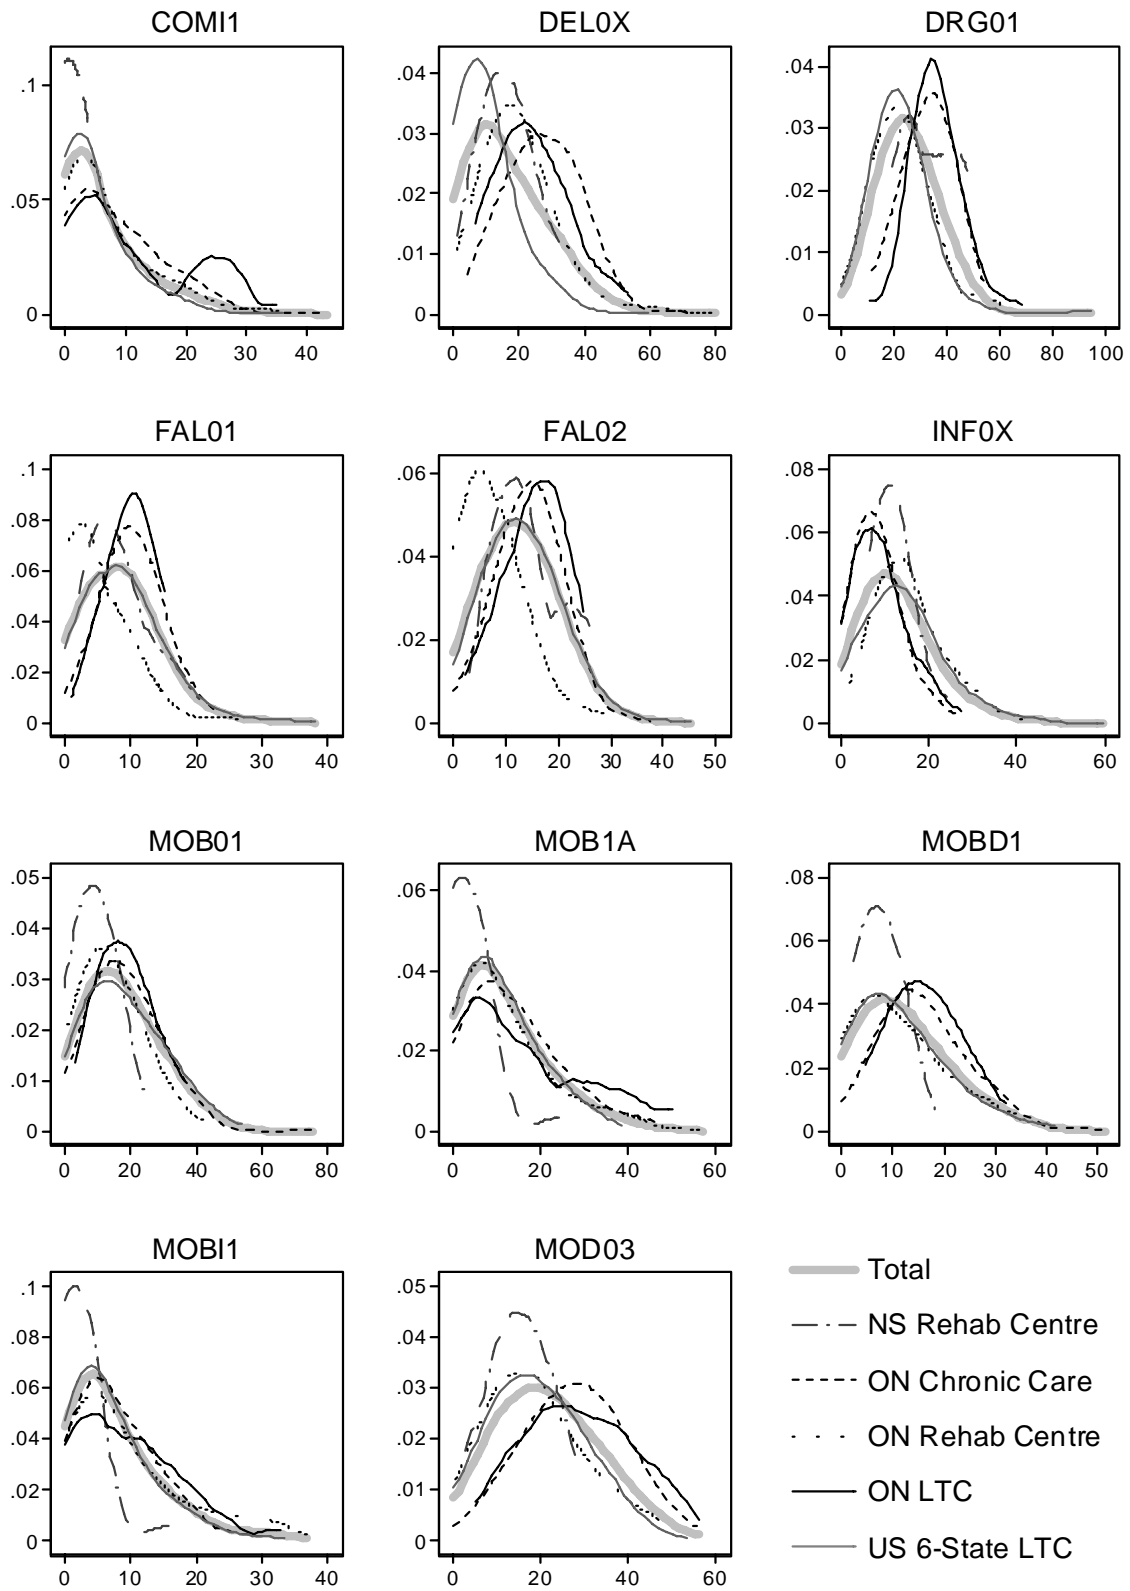

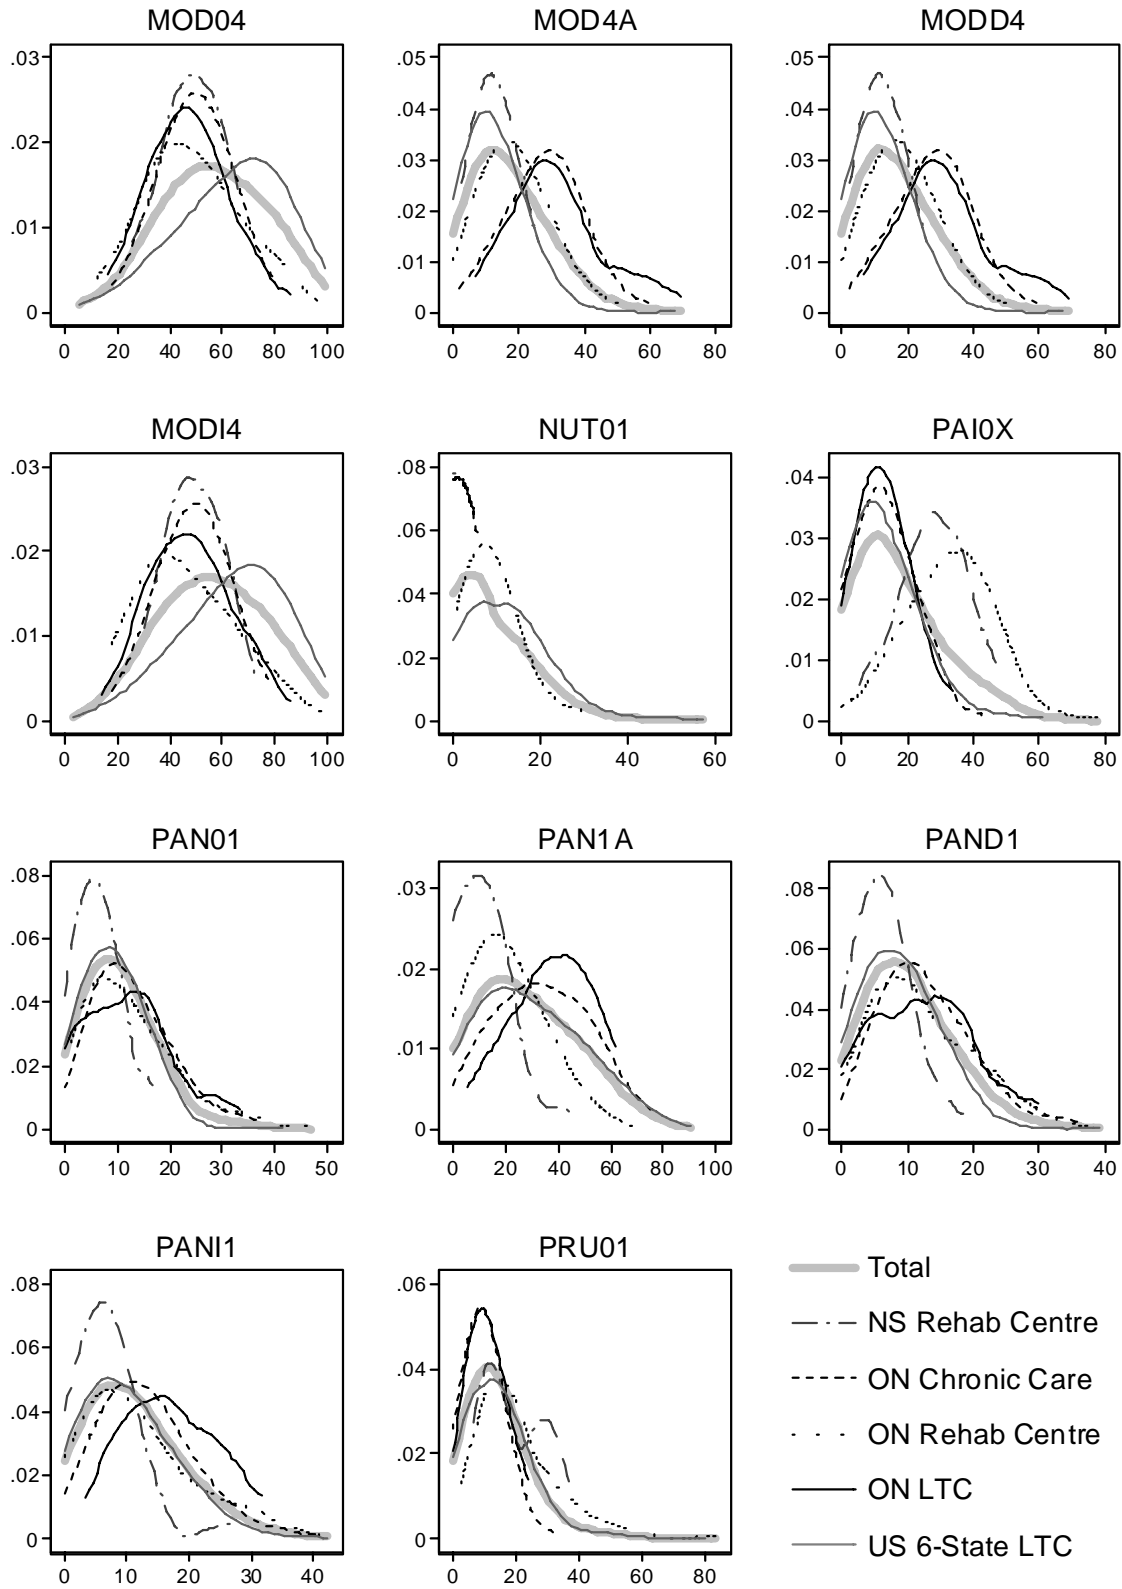

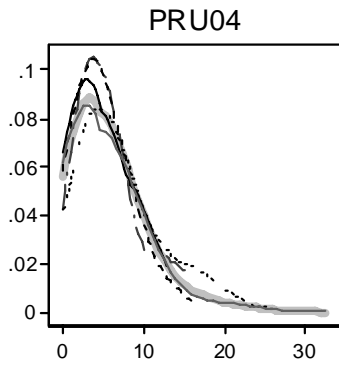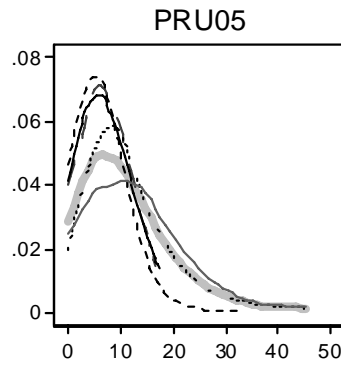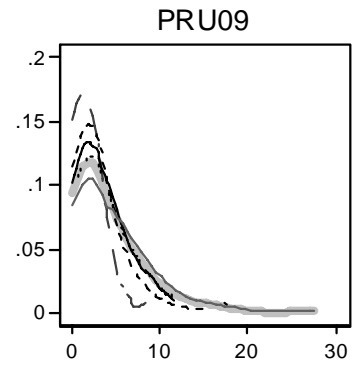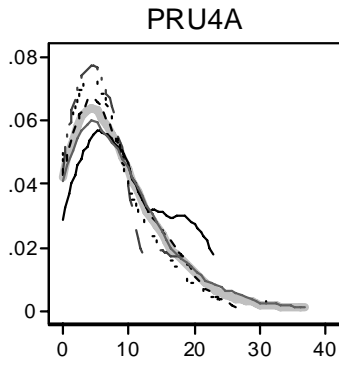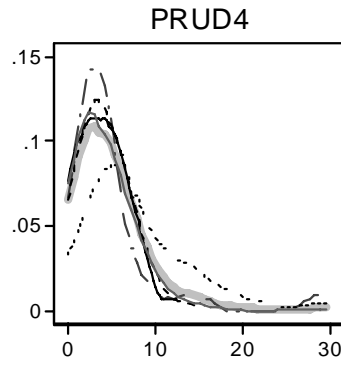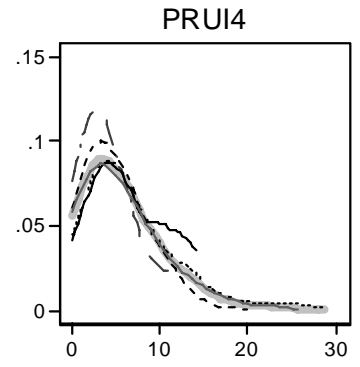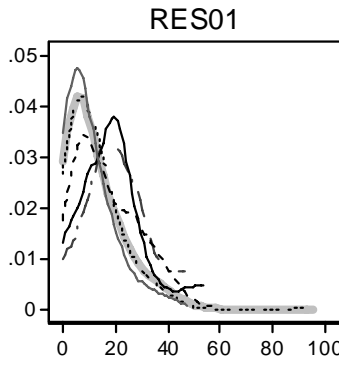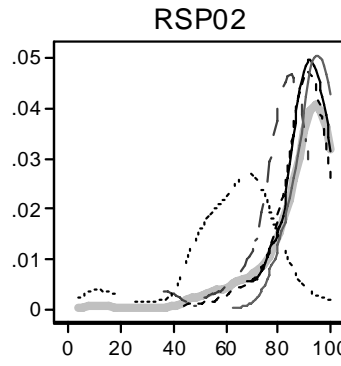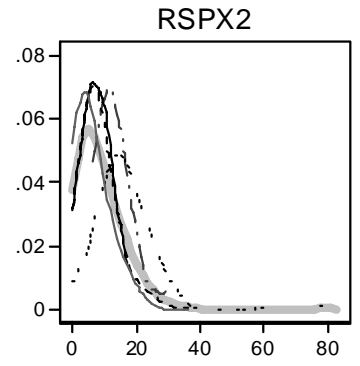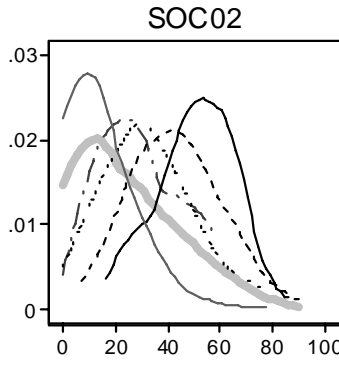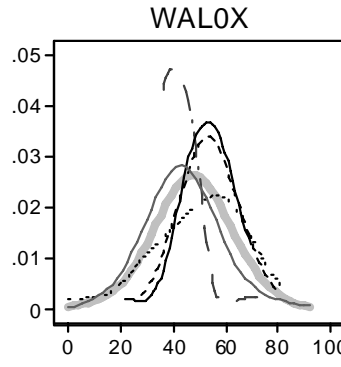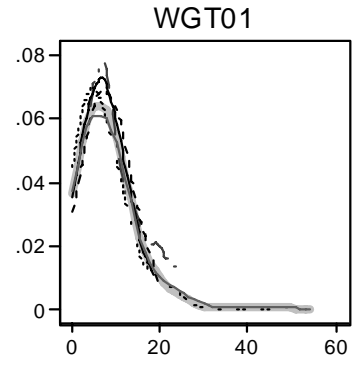

Supplement: MOESM11 [file 9528454]
